# Supplementary figures and images for: Potentially Health-Promoting Spaghetti-Type Pastas Based on Doubly Modified Corn Starch: Starch Oxidation via Wet Chemistry Followed by Organocatalytic Butyrylation Using Reactive Extrusion
Source: MDPI journal article supplement (doi:10.3390/polym15071704), 2023-03-29

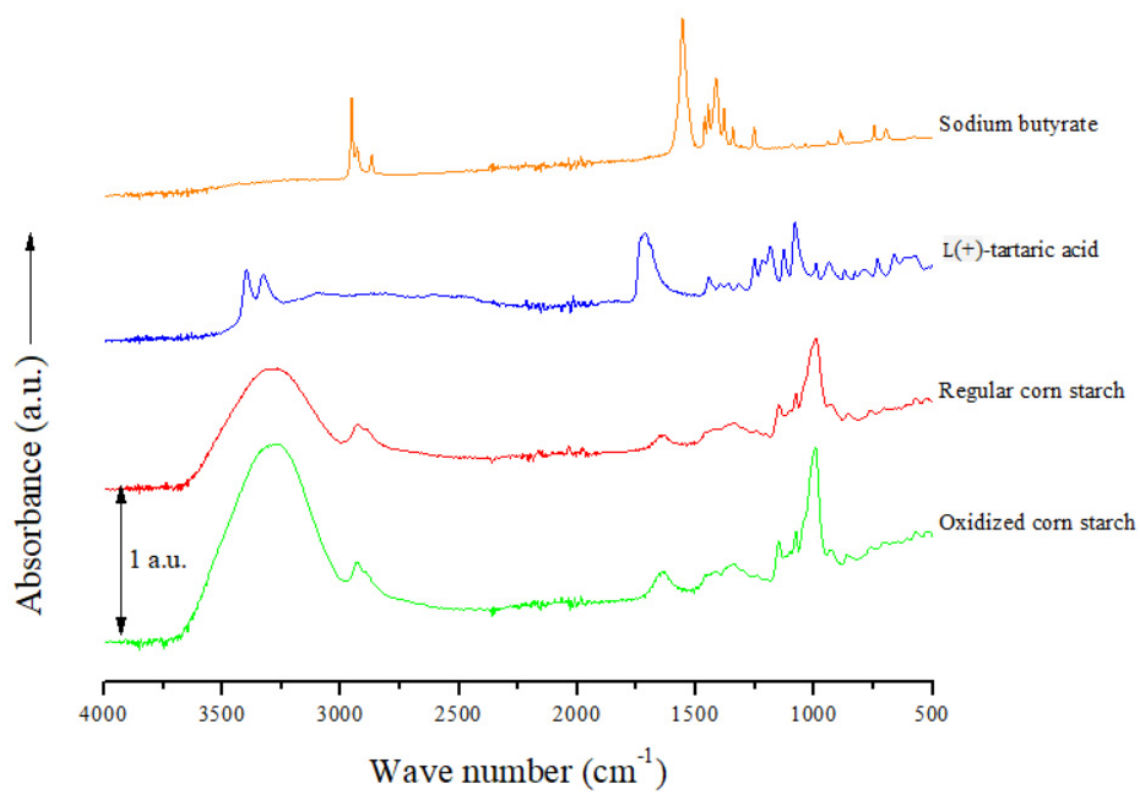

**Figure S1.** ATR/FTIR spectra of the different feedstocks used.

Supplement: s1 [file s1]
